# Supplementary material
Source: PubMed Central journal article supplement (PMC2579968)
Supplement: NIHMS71771-supplement-1.pdf [file NIHMS71771-supplement-1.pdf]

# Activation of Slo1 BK channels by Mg<sup>2+</sup> coordinated between the voltage sensor and the RCK1 domains

Huanghe Yang, Jingyi Shi, Guohui Zhang, Junqiu Yang, Kelli Delaloye and Jianmin Cui

*Department of Biomedical Engineering and Cardiac Bioelectricity and Arrhythmia  
Center, Washington University, 1 Brookings Drive, St. Louis, MO 63130, USA.*

Corresponding Author:

Jianmin Cui, [jcui@biomed.wustl.edu](mailto:jcui@biomed.wustl.edu)

**Supplementary information.**

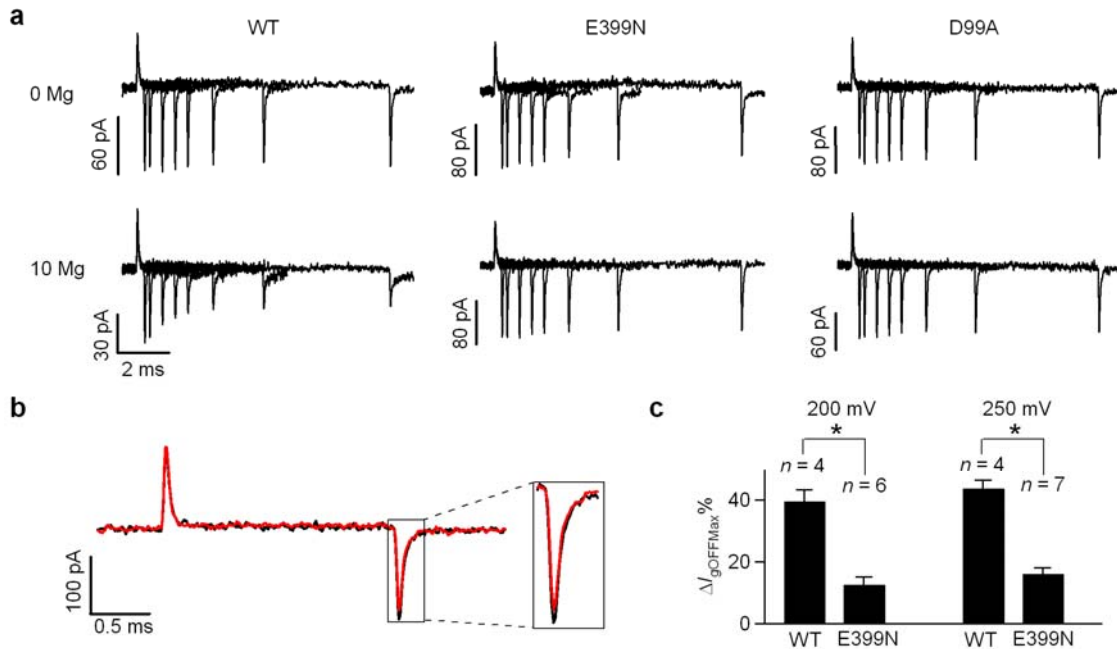

**Supplementary Figure 1.** Eliminating  $Mg^{2+}$  binding alters the response of gating currents ( $I_g$ ) to  $Mg^{2+}$ . **(a)**  $I_g$  traces for WT, E399N and D99A mutant channels in 0 (upper panel) and 10 mM  $[Mg^{2+}]_i$  (lower panel) elicited by voltage pulses to 200 mV with durations of 0.3, 0.5, 1, 1.5, 2, 3, 5 and 10 ms.  $I_g$  traces in 0 and 10 mM  $[Mg^{2+}]_i$  were recorded from separate patches. **(b)** Gating current ( $I_g$ ) traces for E399N mutant channels with (red) and without (black) 10 mM  $[Mg^{2+}]_i$  in response to a 2-ms, 250 mV depolarizing pulse.  $I_g$  traces of the same patch were first recorded in the absence of  $Mg^{2+}$ , and then 10 mM  $[Mg^{2+}]_i$ . **(c)** Effects of 10 mM  $[Mg^{2+}]_i$  on the reduction of peak OFF gating currents ( $I_{gOFFMax}$ ) in response to 2-ms, 200 mV or 250 mV depolarizing pulses.  $\Delta I_{gOFFMax} \% = (I_{gOFFMax}(0Mg) - I_{gOFFMax}(10Mg)) / I_{gOFFMax}(0Mg)$ . \* indicates  $p \leq 0.001$ .

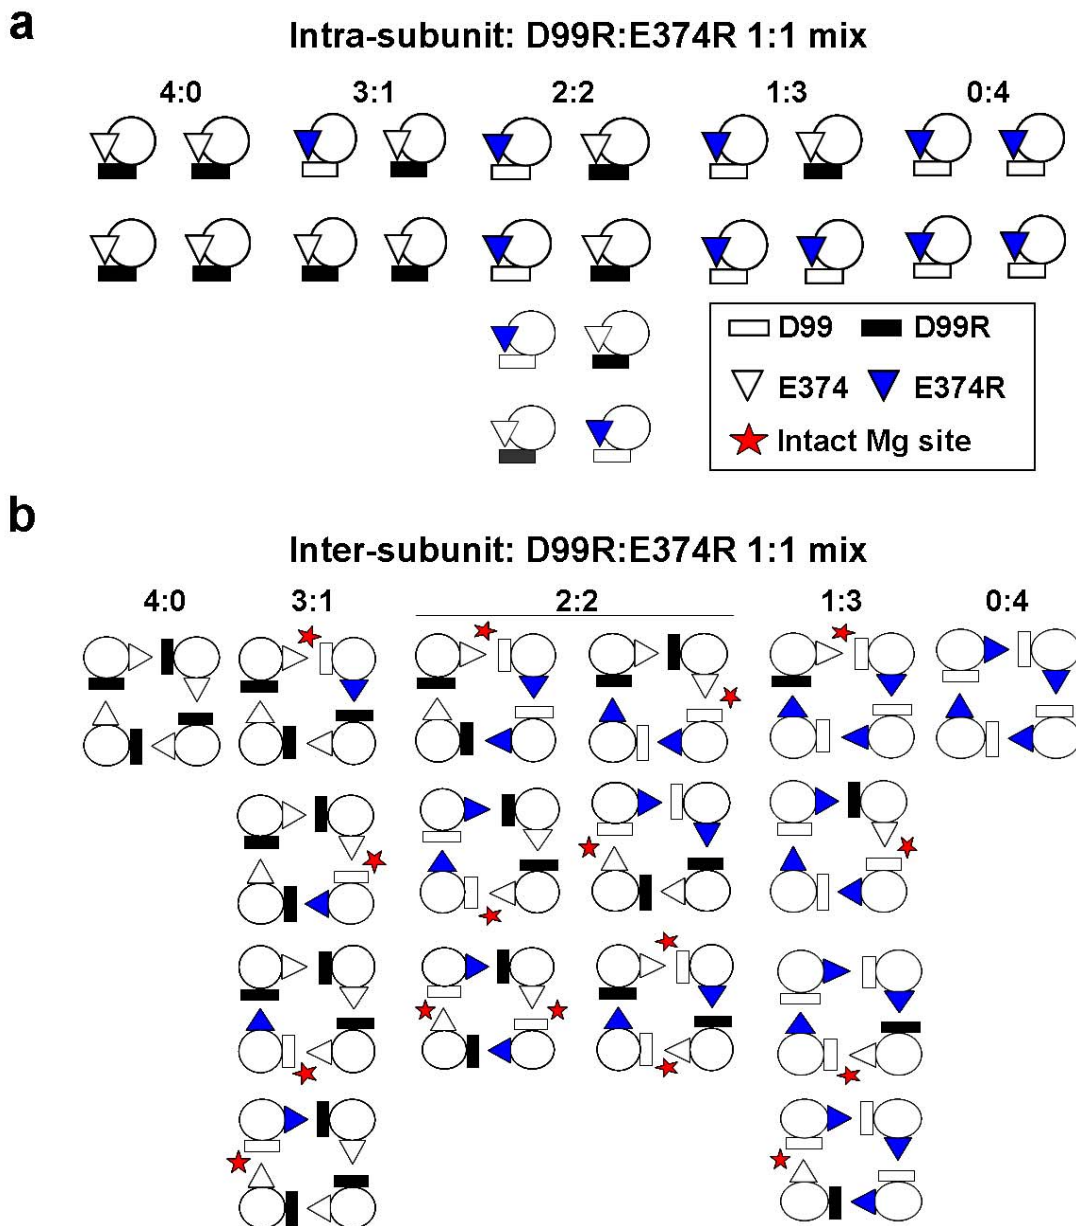

**Supplementary Figure 2.** Binomial distribution of D99R:E374R mixture in 1:1 ratio according to the intra- (a) and inter-subunit (b)  $Mg^{2+}$  binding site models. (a) The intra-subunit  $Mg^{2+}$  binding site model does not predict any intact  $Mg^{2+}$  binding site. In this model, the putative  $Mg^{2+}$  coordinates in the VSD and the cytoplasmic domain are from the same subunit. (b) The inter-subunit  $Mg^{2+}$  binding site model predicts 25% probability to form intact  $Mg^{2+}$  binding sites. In this model, the putative  $Mg^{2+}$  coordinates in the VSD and the cytoplasmic domain are from neighboring subunits.
